# Supplementary material
Source: PubMed Central journal article supplement (PMC9764501)
Supplement: mmc1.pdf [file mmc1.pdf]

# THE LANCET

## Child & Adolescent Health

### Supplementary appendix

This appendix formed part of the original submission and has been peer reviewed.  
We post it as supplied by the authors.

Supplement to: Kostenzer J, Zimmermann LJI, Mader S, on behalf of the EFCNI  
COVID-19 Zero Separation Collaborative Group. Title. *Lancet Child Adolesc Health* 2021;  
published online Nov 16. [http://dx.doi.org/10.1016/S2352-4642\(21\)00340-0](http://dx.doi.org/10.1016/S2352-4642(21)00340-0).

## List of collaborators

### EFCNI COVID-19 Zero Separation Collaborative Group, contributors (in alphabetical order):

| First Name (initials) | Middle Name (initials) | Last Name                    | Affiliation                                                                                                    | Country         |
|-----------------------|------------------------|------------------------------|----------------------------------------------------------------------------------------------------------------|-----------------|
| <b>Aurelia</b>        |                        | <b>Abenstein</b>             | European Foundation for the Care of Newborn Infants                                                            | Germany         |
| <b>Mandy</b>          |                        | <b>Daly</b>                  | NIDCAP and Irish Neonatal Health Alliance                                                                      | Ireland         |
| <b>Sarah</b>          |                        | <b>Fügenschuh</b>            | European Foundation for the Care of Newborn Infants                                                            | Germany         |
| <b>Camilla</b>        |                        | <b>Gizzi</b>                 | UENPS, Department of Paediatrics, Sandro Pertini Hospital, Rome                                                | Italy           |
| <b>Julia</b>          |                        | <b>Hoffmann</b>              | European Foundation for the Care of Newborn Infants                                                            | Germany         |
| <b>Agnes</b>          |                        | <b>van den Hoogen</b>        | ESPR, COINN, Utrecht University, and UMC Utrecht                                                               | The Netherlands |
| <b>Gigi</b>           |                        | <b>Khonyongwa-Fernandez</b>  | NICU Parent Network (NPN)                                                                                      | USA             |
| <b>Mary</b>           |                        | <b>Kinney</b>                | University of the Western Cape                                                                                 | South Africa    |
| <b>Johanna</b>        |                        | <b>Kostenzer</b>             | European Foundation for the Care of Newborn Infants                                                            | Germany         |
| <b>Silke</b>          |                        | <b>Mader</b>                 | European Foundation for the Care of Newborn Infants                                                            | Germany         |
| <b>Kerstin</b>        |                        | <b>Mondry</b>                | European Foundation for the Care of Newborn Infants                                                            | Germany         |
| <b>Corrado</b>        |                        | <b>Moretti</b>               | UENPS, Policlinico Umberto I, Sapienza University of Rome                                                      | Italy           |
| <b>Ilknur</b>         |                        | <b>Okay</b>                  | El Bebek Gül Bebek Derneği                                                                                     | Turkey          |
| <b>Kylie</b>          |                        | <b>Pussell</b>               | Miracle Babies Foundation                                                                                      | Australia       |
| <b>Charles</b>        | <b>C.</b>              | <b>Roehr</b>                 | ESPR, and National Perinatal Epidemiology Unit, Nuffield Department of Population Health, University of Oxford | United Kingdom  |
| <b>Charlotte</b>      |                        | <b>von Rosenstiel-Pulver</b> | European Foundation for the Care of Newborn Infants                                                            | Germany         |
| <b>Eleni</b>          |                        | <b>Vavouraki</b>             | Ilitominon                                                                                                     | Greece          |
| <b>Karen</b>          |                        | <b>Walker</b>                | COINN, Royal Prince Alfred Hospital, University of Sydney                                                      | Australia       |
| <b>Aisling</b>        |                        | <b>Walsh</b>                 | European Foundation for the Care of Newborn Infants                                                            | Germany         |
| <b>Luc</b>            | <b>J.I.</b>            | <b>Zimmermann</b>            | European Foundation for the Care of Newborn Infants, and Maastricht UMC+                                       | Germany         |
